# Supplementary material for: Association between Air Pollution and Emergency Room Visits for Atrial Fibrillation
Source: PubMed Central journal article supplement (PMC5486347; doi:10.3390/ijerph14060661), 2017-06-20
Supplement: ijerph-14-00661-s001.pdf [file ijerph-14-00661-s001.pdf]

# Association between Air Pollution and Emergency Room Visits for Atrial Fibrillation

**Table S1.** Bipollutant models of the association between AF emergency hospital admissions and air pollution levels. Reported statistics are the % increase in risk per 10 unit increase of pollutant (95% CI).

|                                        | Immediate (Lag 0–1) | Retarded (Lag 2–5)  | Extended (Lag 0–5) |
|----------------------------------------|---------------------|---------------------|--------------------|
| PM <sub>10</sub> with NO <sub>2</sub>  | 1.23 (0.31, 2.16)*  | -0.38 (-1.41, 0.67) | 0.27 (-0.94, 1.5)  |
| PM <sub>2.5</sub> with NO <sub>2</sub> | 2.04 (0.26, 3.90)*  | -0.30 (-2.46, 1.14) | 0.69 (-1.89, 3.34) |
| NO <sub>2</sub> with PM <sub>10</sub>  | 0.50 (-0.54, 1.56)  | 0.71 (-0.54, 1.97)  | 0.92 (-0.55, 2.41) |
| NO <sub>2</sub> with PM <sub>25</sub>  | 1.25 (-0.18, 2.71)  | 0.52 (-1.22, 2.29)  | 1.24 (-0.80, 3.33) |

\* *p*-value < 0.05.

**Table S2.** Pre-existing medical conditions in the consecutive case series coming from a single hospital from which those data were available (*n* = 4482; only years 2006–2010). Median age was 72 years (min = 45; max = 100); women represented 51.8% of total patients.

| Medical condition                                      | Frequency ( <i>n</i> = 4482) |
|--------------------------------------------------------|------------------------------|
| Diabetes                                               | 11.9%                        |
| Cardiovascular disease                                 | 75.4%                        |
| Chronic respiratory disease                            | 8.8%                         |
| Oncological, liver, renal or neurodegenerative disease | 22.5%                        |

**Lag-response curve for a 10-unit increase in PM<sub>10</sub>**

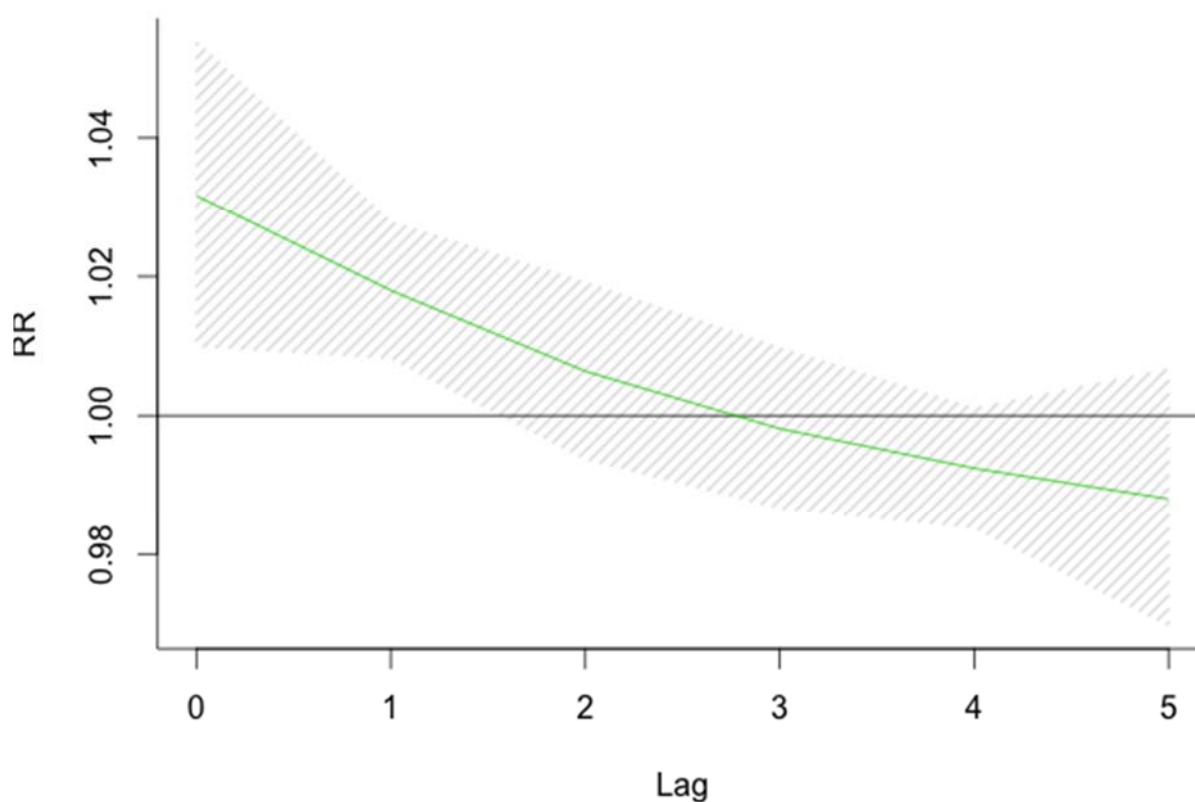

**Figure S1.** Relative risks of emergency room admission for atrial fibrillation associated with PM<sub>10</sub> of 44.5  $\mu\text{g}/\text{m}^3$  compared to a centered concentration of PM<sub>10</sub> = 34.5  $\mu\text{g}/\text{m}^3$  (mean of the whole study period) on lag 0 to 5 in Rome during 2001–2014.

### Lag-response curve for a 10-unit increase in PM<sub>2.5</sub>

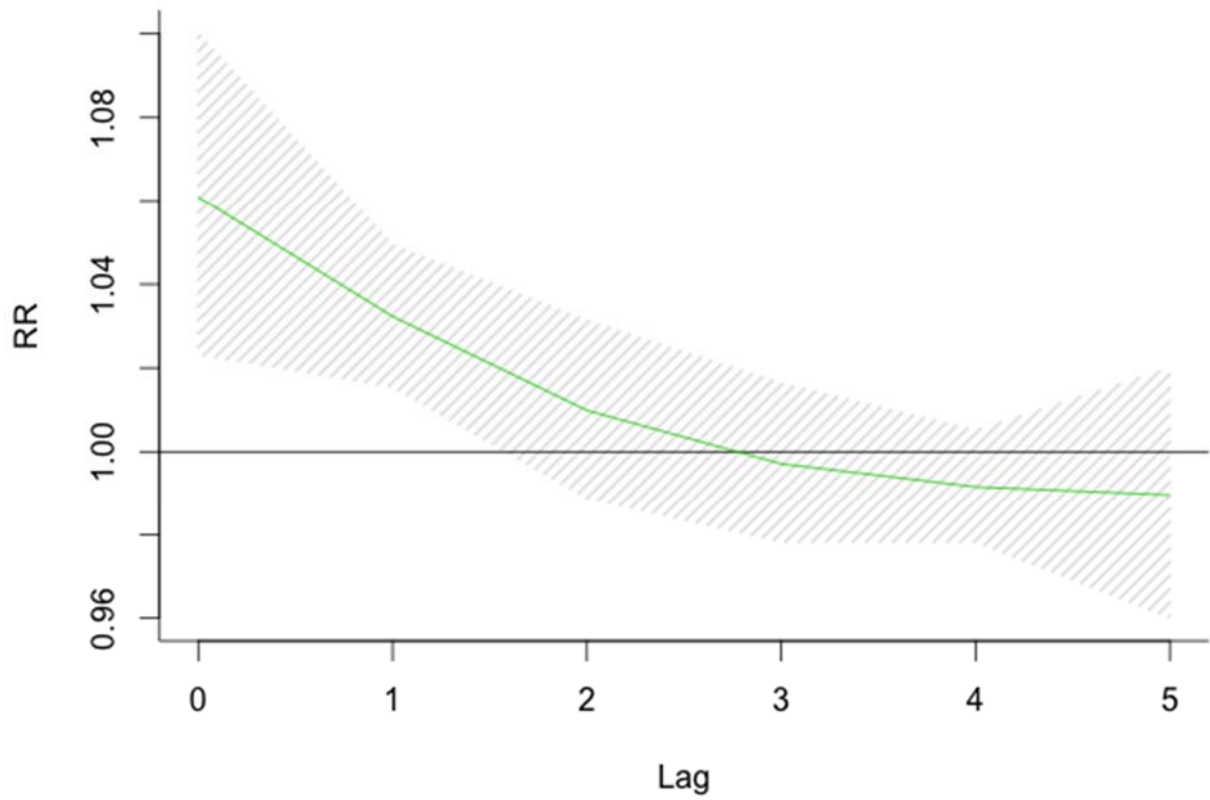

**Figure S2.** Relative risks of emergency room admission for atrial fibrillation associated with PM<sub>2.5</sub> of 28.7  $\mu\text{g}/\text{m}^3$  compared to a centered concentration of PM<sub>2.5</sub> = 18.7  $\mu\text{g}/\text{m}^3$  (mean of the whole study period) on lag 0 to 5 in Rome during 2001–2014.

### Lag-response curve for a 10-unit increase in NO<sub>2</sub>

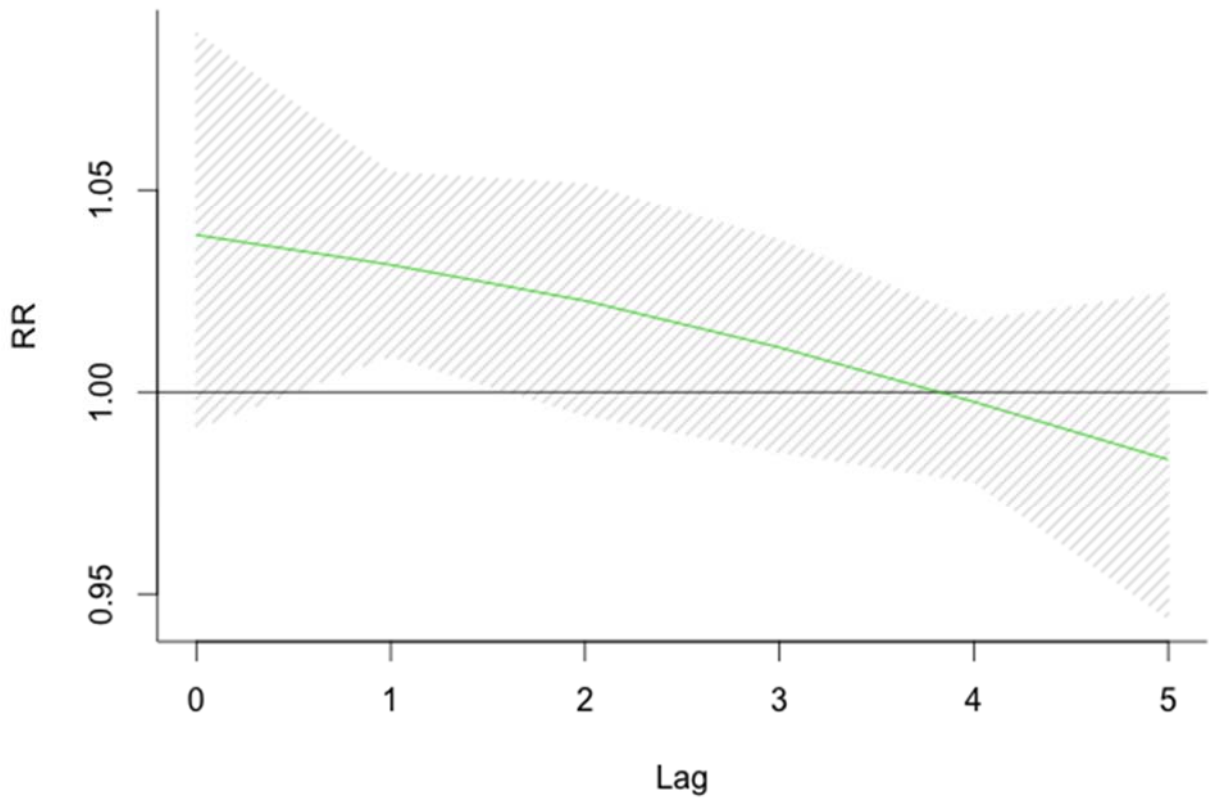

**Figure S3.** Relative risks of emergency room admission for atrial fibrillation associated with NO<sub>2</sub> of 68.3  $\mu\text{g}/\text{m}^3$  compared to a centered concentration of NO<sub>2</sub> = 58.3  $\mu\text{g}/\text{m}^3$  (mean of the whole study period) on lag 0 to 5 in Rome during 2001–2014.
